# Supplementary material
Source: PubMed Central journal article supplement (PMC3898662)
Supplement: NIHMS488821-supplement-stable.pdf [file NIHMS488821-supplement-stable.pdf]

**Table S1.**

| <b>Gene</b>    | <b>Forward primer</b>          | <b>Reverse primer</b>       |
|----------------|--------------------------------|-----------------------------|
| <b>PTEN</b>    | GGCGGAACCTTGCAATCCTCAGTTT      | TATCACACACACAGGTAACGGCT     |
| <b>OCT4</b>    | ACATCAAAGCTCTGCAGAAAGAACT      | CTGAATACCTTCCCAAATAGAACCC   |
| <b>NANOG</b>   | CAGCTGTGTGTACTIONCAATGATAGATTT | ACACCATTGCTATTCTTCGGCCAGTTG |
| <b>SOX2</b>    | CTTTTGTTCGATCCCAACTTTC         | ATACATGGATTCTCGGCAGACT      |
| <b>UTF1</b>    | TCGCTGAACACCGCCCTGCT           | CTCCACGTGCTGGTTCAAGGT       |
| <b>DPPA2</b>   | AGGCTTCATAGGCATGCTTAC          | TGAAGCCTTGCTCTCTTGGTC       |
| <b>DPPA5</b>   | AGGTCGTGGTTTACGGCTCCT          | ATGGCTTCGGCAAGTTTGAGC       |
| <b>DNMT3B</b>  | AAGGTGCGTCGTGCAGGCAG           | TCTTGAGGCGCTTGGGTGCG        |
| <b>TDGF</b>    | TATTGGCCAGTCTGGTCTGGAACT       | ATCAAGAAACACCAGGCCTTGAC     |
| <b>MAP2</b>    | CTTCGGCTTATTAACCAACCA          | TGGGCCTTTTCTTTGAAATCTA      |
| <b>NEUROD1</b> | GCCCCAGGGTTATGAGACTA           | GTGAGTCCTCCTCTGCGTTC        |
| <b>PAX6</b>    | CCAGAAAGGATGCCTCATAAA          | TCTGCGCGCCCTAGTTA           |
| <b>TUJ1</b>    | GTACGAAGACGACCAGGAGG           | GGGTTTAGACACTGCTGGCT        |
| <b>FOXA2</b>   | GGAGCGGTGAAGATGGAA             | TACGTGTTTCATGCCGTTTCAT      |
| <b>GATA4</b>   | TCCAAACCAGAAAACGGAAGC          | GCCCGTAGTGAGATGACAGG        |
| <b>SOX17</b>   | CAGAATCCAGACCTGCACAA           | GCGGCCGGTACTTGTAGTT         |
| <b>T</b>       | TGCTTCCCTGAGACCCAGTT           | GATCACTTCTTTCTTTGCATCAAG    |
| <b>PECAM</b>   | TCTGAACTCCAACAACGAGAA          | GCAGGGCAGGTTTCATAAATAA      |
| <b>CD34</b>    | TGAAGCCTAGCCTGTACCT            | CGCACAGCTGGAGGTCTTAT        |
