# Supplementary material
Source: PubMed Central journal article supplement (PMC3898662)

Supplemental Figure 1

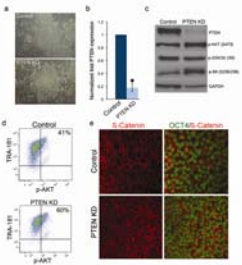

Supplement: NIHMS488821-supplement-s1.pdf [file NIHMS488821-supplement-s1.pdf]

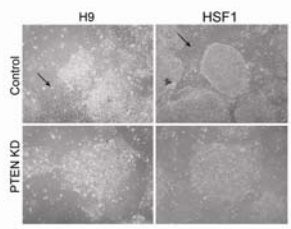

Supplement: NIHMS488821-supplement-s2.pdf [file NIHMS488821-supplement-s2.pdf]

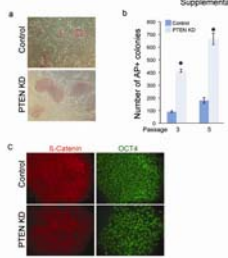

Supplement: NIHMS488821-supplement-s3.pdf [file NIHMS488821-supplement-s3.pdf]

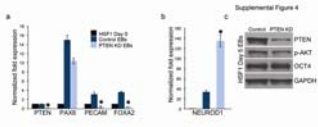

Supplement: NIHMS488821-supplement-s4.pdf [file NIHMS488821-supplement-s4.pdf]

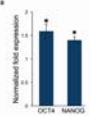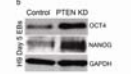

Supplement: NIHMS488821-supplement-s5.pdf [file NIHMS488821-supplement-s5.pdf]

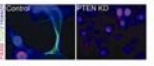

Supplement: NIHMS488821-supplement-s6.pdf [file NIHMS488821-supplement-s6.pdf]

Supplemental Figure 7

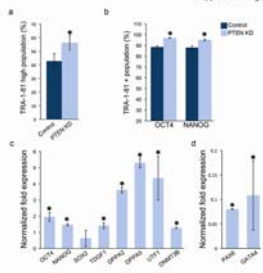

Supplement: NIHMS488821-supplement-s7.pdf [file NIHMS488821-supplement-s7.pdf]
